# Supplementary material for: A hydrogen-bonded and π–π assembled 3D supramolecular network, [Co(en)3]·1.5(C5O5), with 1D microporous hydrophilic channels showing reversible water ad/de-sorption property
Source: Royal Society of Chemistry journal article supplement (doi:10.1039/c2ce25327e), 2012-01-01
Supplement: c2ce25327e.pdf [file c2ce25327e.pdf]

# A Hydrogen-bonded and $\pi$ - $\pi$ Assembled 3D Supramolecular Network, [Co(en)<sub>3</sub>] $\cdot$ 1.5(C<sub>5</sub>O<sub>5</sub>), with 1D Microporous Hydrophilic Channels Showing Reversible Water ad/de-sorption Property

Chih-Chieh Wang,<sup>\*a</sup> Chang-Tsung Yeh,<sup>a</sup> Yi-Ting Cheng,<sup>a</sup> I-Hsuan Chen,<sup>a</sup> Gene-Hsiang Lee,<sup>b</sup>  
Wei-Ju Shih,<sup>c</sup> Hwo-Shuenn Sheu<sup>c</sup> and Vladimir, E. Fedorov<sup>d</sup>

<sup>a</sup>*Department of Chemistry, Soochow University, Taipei, Taiwan. Fax: 886-2-28811053,  
E-mail: ccwang@scu.edu.tw.*

<sup>b</sup>*Instrumentation Center, National Taiwan University, Taipei, Taiwan.*

<sup>c</sup>*National Synchrotron Radiation Research Center, Hsinchu 300, Taiwan*

<sup>d</sup>*Nikolaev Institute of Inorganic Chemistry, Siberian Branch of the Russian Academy of  
Sciences, 3 Acad. Lavrentiev pr., Novosibirsk 630090, Russian*

## Supplementary Materials :

**S**Table 1. The N–H...O and O–H...O hydrogen bonds for **1**.

**S**Figure 1. TG measurements of cyclic ethanol (EtOH) de- and re-solvation processes were repeated three times.

**S**Figure 2. Simulated PXRD pattern of **1** from single-crystal x-ray diffraction data and *in-situ* temperature-dependent powder XRD of **1** at various temperatures.

**S**Figure 3. N<sub>2</sub> Gas adsorption-desorption isotherms for **1** at 77 K.

**Table 1.** The N–H...O and O–H...O hydrogen bonds for **1**<sup>a</sup>.

| D–H...A (°)                           | D–H (Å) | H...A (Å) | D...A (Å) | ∠ D–H...A (°) |
|---------------------------------------|---------|-----------|-----------|---------------|
| N(1)–H(1A)...O(4) <sub>(ii)</sub>     | 0.92    | 2.15      | 2.9854    | 151           |
| N(1)–H(1B)...O(2)                     | 0.92    | 2.10      | 2.9697    | 156           |
| N(2)–H(2A)...O(9)                     | 0.92    | 2.10      | 2.9892    | 163           |
| N(2)–H(3B)...O(8) <sub>(iii)</sub>    | 0.92    | 2.20      | 3.0594    | 155           |
| N(3)–H(3A)...O(7) <sub>(iv)</sub>     | 0.92    | 2.17      | 2.9987    | 149           |
| N(3)–H(3B)...O(7)                     | 0.92    | 2.08      | 2.9486    | 158           |
| N(4)–H(4A)...O(1) <sub>(v)</sub>      | 0.92    | 2.13      | 2.9305    | 144           |
| N(4)–H(4B)...O(1)                     | 0.92    | 2.38      | 3.0364    | 128           |
| N(4)–H(4B)...O(4) <sub>(ii)</sub>     | 0.92    | 2.21      | 2.9464    | 136°          |
| N(5)–H(5A)...O(11)                    | 0.92    | 2.24      | 3.0812    | 153           |
| N(5)–H(5B)...O(1)                     | 0.92    | 2.10      | 2.9858    | 161           |
| N(5)–H(5B)...O(2)                     | 0.92    | 2.53      | 2.9778    | 110°          |
| N(6)–H(6A)...O(5) <sub>(v)</sub>      | 0.92    | 1.98      | 2.8277    | 152           |
| N(6)–H(6B)...O(6)                     | 0.92    | 1.93      | 2.8289    | 165           |
| O(9)–H(9C)...O(11)                    | 0.87    | 2.39      | 3.1840    | 152           |
| O(9)–H(9D)...O(12)                    | 0.87    | 2.10      | 2.7581    | 132           |
| O(10)–H(10D)...O(6)                   | 0.85    | 2.47      | 3.0261    | 124           |
| O(10)–H(10D)...O(6) <sub>(i)</sub>    | 0.85    | 2.37      | 3.0261    | 134°          |
| O(11)–H(11C)...O(12)                  | 1.00    | 1.78      | 2.4475    | 121           |
| O(11)–H(11D)...O(12) <sub>(vii)</sub> | 0.95    | 1.82      | 2.6407    | 142           |
| C(9)–H(9B)...O(7) <sub>(iv)</sub>     | 0.99    | 2.55      | 3.5168    | 165           |
| C(11)–H(11B)...O(4) <sub>(ii)</sub>   | 0.99    | 2.42      | 3.1495    | 130           |
| C(13)–H(13B)...O(3) <sub>(vi)</sub>   | 0.99    | 2.51      | 3.0624    | 115           |
| C(14)–H(14A)...O(9)                   | 0.99    | 2.54      | 3.4788    | 159           |

<sup>a</sup>Symmetry operations used to generate equivalent atoms: (i) -x, y, 3/2-z (ii) 1/2-x, 1/2-y, -z (iii) -x, -y, 1-z (iv) x, -y, -1/2+z (v) 1/2-x, 1/2-y, 1-z (vi) x, y, 1+z (vii) x, 1-y, -1/2+z

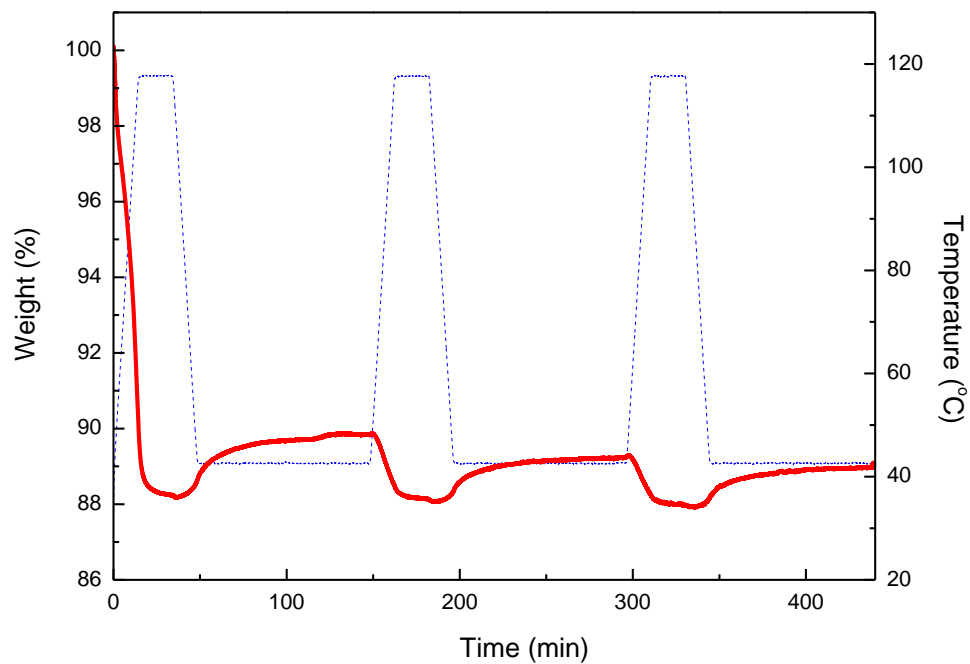

**SFigure 1.** TG measurements of cyclic ethanol (EtOH) de- and re-solvation processes were repeated three times.

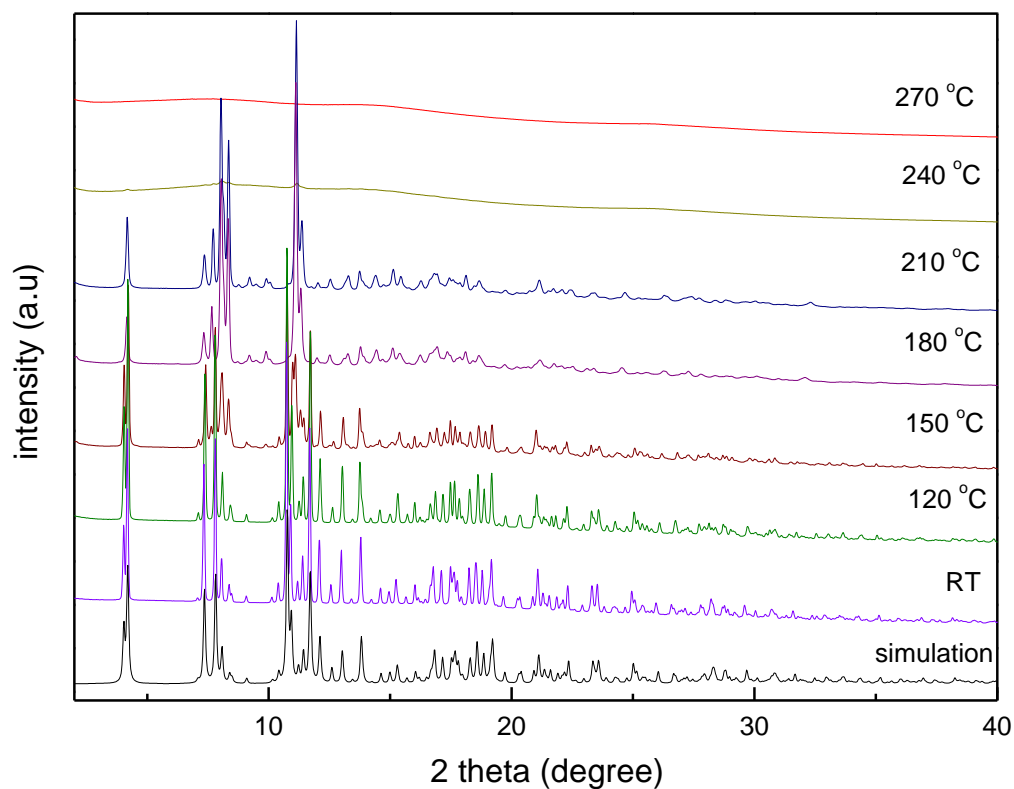

**SFigure 2.** Simulated PXRD pattern of **1** from single-crystal x-ray diffraction data and *in-situ* temperature-dependent powder XRD of **1** at various temperatures.

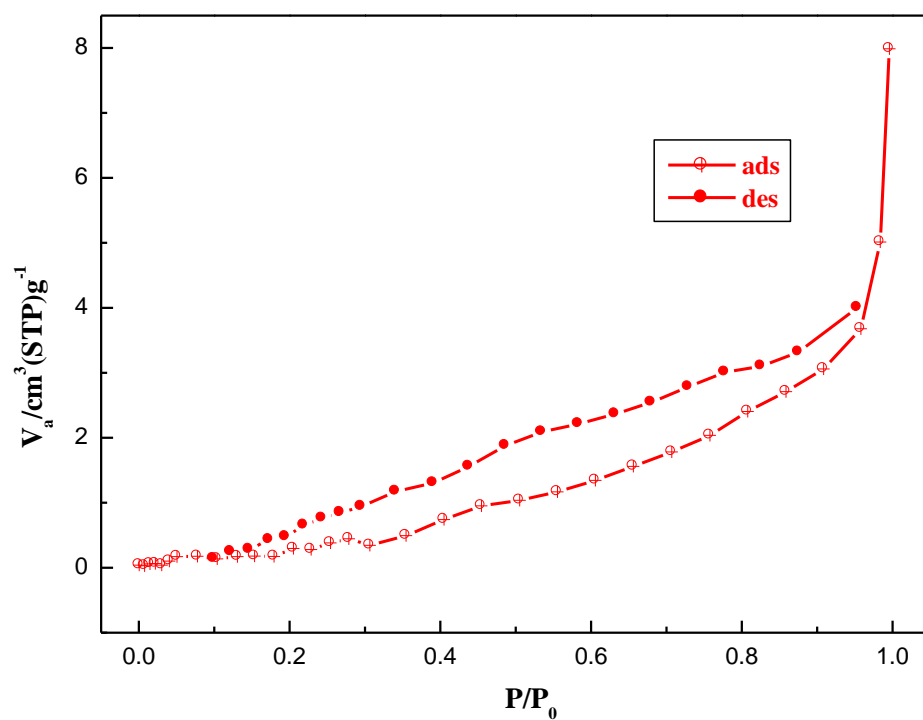

**SFigure 3.  $\text{N}_2$  Gas adsorption-desorption isotherms for 1 at 77 K.**
